# Supplementary material for: Astrocytic-OTUD7B ameliorates murine experimental autoimmune encephalomyelitis by stabilizing glial fibrillary acidic protein and preventing inflammation
Source: Nat Commun. 2025 Oct 20;16:9279. doi: 10.1038/s41467-025-65093-4 (PMC12537900; doi:10.1038/s41467-025-65093-4)
Supplement: Supplementary file 3 — Supplementary Dataset 1 [file 41467_2025_65093_MOESM3_ESM.xlsx]

## Sheet: Xenium mouse Brain_v1.
Genes	Ensembl_ID	Num_Probesets	Codewords	Annotation
2010300C02Rik	ENSMUSG00000026090	8	1	CA2
Acsbg1	ENSMUSG00000032281	7	1	Astrocytes
Acta2	ENSMUSG00000035783	8	1	Pericytes / smooth muscle cells
Acvrl1	ENSMUSG00000000530	8	1	Endothelial cells
Adamts2	ENSMUSG00000036545	8	1	L2 IT ENTm
Adamtsl1	ENSMUSG00000066113	8	1	CT SUB
Adgrl4	ENSMUSG00000039167	8	1	Endothelial cells
Aldh1a2	ENSMUSG00000013584	7	1	VLMC
Angpt1	ENSMUSG00000022309	8	1	L5 PPP
Ano1	ENSMUSG00000031075	8	1	Pericytes / smooth muscle cells
Aqp4	ENSMUSG00000024411	8	1	Astrocytes
Arc	ENSMUSG00000022602	8	1	L4/5 IT CTX
Arhgap12	ENSMUSG00000041225	8	1	CA1-ProS
Arhgap25	ENSMUSG00000030047	8	1	Microglia / perivascular macrophages
Arhgap6	ENSMUSG00000031355	8	1	Pericytes / smooth muscle cells
Arhgef28	ENSMUSG00000021662	8	1	CA2
Bcl11b	ENSMUSG00000048251	8	1	CA2
Bdnf	ENSMUSG00000048482	8	1	Car3
Bhlhe22	ENSMUSG00000025128	8	1	CA2
Bhlhe40	ENSMUSG00000030103	8	1	SUB-ProS
Btbd11	ENSMUSG00000020042	8	1	Pvalb interneurons
Cabp7	ENSMUSG00000009075	8	1	CA2
Cacna2d2	ENSMUSG00000010066	8	1	Cajal-Retzius cells
Calb1	ENSMUSG00000028222	8	1	Sst interneurons
Calb2	ENSMUSG00000003657	7	1	Cajal-Retzius cells
Car4	ENSMUSG00000000805	8	1	Endothelial cells
Carmn	ENSMUSG00000097324	8	1	Pericytes / smooth muscle cells
Cbln1	ENSMUSG00000031654	8	1	L4 RSP-ACA
Cbln4	ENSMUSG00000067578	8	1	L2 IT ENTm
Ccn2	ENSMUSG00000019997	8	1	L6b CTX
Cd24a	ENSMUSG00000047139	8	1	Cajal-Retzius cells
Cd300c2	ENSMUSG00000044811	8	1	Microglia / perivascular macrophages
Cd44	ENSMUSG00000005087	8	1	L3 IT ENT
Cd53	ENSMUSG00000040747	8	1	Microglia / perivascular macrophages
Cd68	ENSMUSG00000018774	8	1	Microglia / perivascular macrophages
Cd93	ENSMUSG00000027435	8	1	Endothelial cells
Cdh13	ENSMUSG00000031841	8	1	L2 IT ENTm
Cdh20	ENSMUSG00000050840	8	1	Astrocytes
Cdh4	ENSMUSG00000000305	8	1	Cajal-Retzius cells
Cdh6	ENSMUSG00000039385	8	1	SUB-ProS
Cdh9	ENSMUSG00000025370	8	1	Dentate gyrus granule cells
Chat	ENSMUSG00000021919	8	1	Vip interneurons
Chodl	ENSMUSG00000022860	8	1	Sst Chodl inteneurons
Chrm2	ENSMUSG00000045613	8	1	Sst Chodl inteneurons
Cldn5	ENSMUSG00000041378	4	1	Endothelial cells
Clmn	ENSMUSG00000021097	8	1	Astrocytes
Cntn6	ENSMUSG00000030092	8	1	NP SUB
Cntnap4	ENSMUSG00000031772	8	1	Pvalb interneurons
Cntnap5b	ENSMUSG00000067028	8	1	L2/3 IT RHP
Cobll1	ENSMUSG00000034903	8	1	Endothelial cells
Col19a1	ENSMUSG00000026141	8	1	Sncg interneurons
Col1a1	ENSMUSG00000001506	7	1	VLMC
Col6a1	ENSMUSG00000001119	8	1	VLMC
Cort	ENSMUSG00000028971	4	1	Sst Chodl inteneurons
Cplx3	ENSMUSG00000039714	7	1	L6b CTX
Cpne4	ENSMUSG00000032564	8	1	CA2
Cpne6	ENSMUSG00000022212	8	1	CA3
Cpne8	ENSMUSG00000052560	8	1	Meis2
Crh	ENSMUSG00000049796	8	1	Vip interneurons
Cspg4	ENSMUSG00000032911	8	1	Pericytes / smooth muscle cells
Cux2	ENSMUSG00000042589	8	1	Car3
Cwh43	ENSMUSG00000029154	8	1	L6b/CT ENT
Cyp1b1	ENSMUSG00000024087	8	1	VLMC
Dcn	ENSMUSG00000019929	8	1	VLMC
Deptor	ENSMUSG00000022419	8	1	L5 IT CTX
Dkk3	ENSMUSG00000030772	8	1	L5 IT CTX
Dner	ENSMUSG00000036766	8	1	Lamp5 interneurons
Dpy19l1	ENSMUSG00000043067	8	1	L5 PPP
Dpyd	ENSMUSG00000033308	8	1	L2 IT ENTl
Ebf3	ENSMUSG00000010476	8	1	Cajal-Retzius cells
Emcn	ENSMUSG00000054690	8	1	Endothelial cells
Epha4	ENSMUSG00000026235	7	1	CA3
Eya4	ENSMUSG00000010461	8	1	Pvalb interneurons
Fezf2	ENSMUSG00000021743	8	1	L5 NP CTX
Fgd5	ENSMUSG00000034037	8	1	Endothelial cells
Fhod3	ENSMUSG00000034295	8	1	L4/5 IT CTX
Fibcd1	ENSMUSG00000026841	8	1	CA1-ProS
Fign	ENSMUSG00000075324	8	1	L2/3 IT ENTl
Fmod	ENSMUSG00000041559	8	1	VLMC
Fn1	ENSMUSG00000026193	8	1	Endothelial cells
Fos	ENSMUSG00000021250	8	1	Pericytes / smooth muscle cells
Foxp2	ENSMUSG00000029563	8	1	L6 CT CTX
Gad1	ENSMUSG00000070880	4	1	Lamp5 interneurons
Gad2	ENSMUSG00000026787	4	1	Lamp5 interneurons
Gadd45a	ENSMUSG00000036390	8	1	L6 CT CTX
Galnt14	ENSMUSG00000024064	8	1	L6 IT ENTl
Garnl3	ENSMUSG00000038860	8	1	L6 CT CTX
Gfap	ENSMUSG00000020932	4	1	Astrocytes
Gfra2	ENSMUSG00000022103	8	1	L4/5 IT CTX
Gjb2	ENSMUSG00000046352	8	1	VLMC
Gjc3	ENSMUSG00000056966	8	1	Oligodendrocytes
Gli3	ENSMUSG00000021318	7	1	Astrocytes
Gm19410	ENSMUSG00000109372	8	1	L5 PT CTX
Gm2115	ENSMUSG00000097789	8	1	SUB-ProS
Gng12	ENSMUSG00000036402	8	1	L6b CTX
Gpr17	ENSMUSG00000052229	8	1	Oligodendrocytes
Grik3	ENSMUSG00000001985	8	1	Meis2
Gsg1l	ENSMUSG00000046182	8	1	L2 IT ENTm
Gucy1a1	ENSMUSG00000033910	8	1	Pericytes / smooth muscle cells
Hapln1	ENSMUSG00000021613	8	1	Lamp5 interneurons
Hat1	ENSMUSG00000027018	8	1	CA3
Hpcal1	ENSMUSG00000071379	8	1	L3 IT ENT
Hs3st2	ENSMUSG00000046321	8	1	L5 IT CTX
Htr1f	ENSMUSG00000050783	8	1	Meis2
Id2	ENSMUSG00000020644	8	1	Astrocytes
Igf1	ENSMUSG00000020053	8	1	Vip interneurons
Igf2	ENSMUSG00000048583	8	1	VLMC
Igfbp4	ENSMUSG00000017493	8	1	CA2
Igfbp5	ENSMUSG00000026185	8	1	L3 IT ENT
Igfbp6	ENSMUSG00000023046	6	1	L2/3 IT CTX
Igsf21	ENSMUSG00000040972	8	1	L6b/CT ENT
Ikzf1	ENSMUSG00000018654	8	1	Microglia / perivascular macrophages
Inpp4b	ENSMUSG00000037940	8	1	Pericytes / smooth muscle cells
Kcnh5	ENSMUSG00000034402	8	1	L4/5 IT CTX
Kcnmb2	ENSMUSG00000037610	8	1	Pvalb interneurons
Kctd12	ENSMUSG00000098557	7	1	Sncg interneurons
Kctd8	ENSMUSG00000037653	8	1	Cajal-Retzius cells
Kdr	ENSMUSG00000062960	8	1	Endothelial cells
Lamp5	ENSMUSG00000027270	8	1	Lamp5 interneurons
Laptm5	ENSMUSG00000028581	8	1	Microglia / perivascular macrophages
Ly6a	ENSMUSG00000075602	8	1	Endothelial cells
Lypd6	ENSMUSG00000050447	8	1	Sst interneurons
Mapk4	ENSMUSG00000024558	8	1	Astrocytes
Mdga1	ENSMUSG00000043557	8	1	Car3
Mecom	ENSMUSG00000027684	8	1	Endothelial cells
Meis2	ENSMUSG00000027210	8	1	Meis2
Myl4	ENSMUSG00000061086	8	1	L5 NP CTX
Myo16	ENSMUSG00000039057	8	1	Meis2
Ndst3	ENSMUSG00000027977	8	1	L5 PPP
Ndst4	ENSMUSG00000027971	8	1	Sst Chodl inteneurons
Necab1	ENSMUSG00000040536	8	1	Sncg interneurons
Necab2	ENSMUSG00000031837	7	1	CA2
Nell1	ENSMUSG00000055409	8	1	L4 RSP-ACA
Neto2	ENSMUSG00000036902	8	1	L5 NP CTX
Neurod6	ENSMUSG00000037984	7	1	CA3
Nostrin	ENSMUSG00000034738	8	1	Endothelial cells
Npnt	ENSMUSG00000040998	8	1	L5 PT CTX
Npy2r	ENSMUSG00000028004	8	1	CA3
Nr2f2	ENSMUSG00000030551	8	1	Pericytes / smooth muscle cells
Nrep	ENSMUSG00000042834	8	1	L4 RSP-ACA
Nrn1	ENSMUSG00000039114	8	1	L2 IT ENTl
Nrp2	ENSMUSG00000025969	8	1	CA3
Nts	ENSMUSG00000019890	8	1	L5 PPP
Ntsr2	ENSMUSG00000020591	5	1	Astrocytes
Nwd2	ENSMUSG00000090061	8	1	L2 IT ENTm
Nxph3	ENSMUSG00000046719	8	1	NP SUB
Opalin	ENSMUSG00000050121	8	1	Oligodendrocytes
Opn3	ENSMUSG00000026525	8	1	L4 RSP-ACA
Orai2	ENSMUSG00000039747	8	1	Dentate gyrus granule cells
Paqr5	ENSMUSG00000032278	8	1	Endothelial cells
Parm1	ENSMUSG00000034981	8	1	L4 RSP-ACA
Pcsk5	ENSMUSG00000024713	8	1	NP PPP
Pde11a	ENSMUSG00000075270	8	1	Lamp5 interneurons
Pde7b	ENSMUSG00000019990	8	1	Astrocytes
Pdgfra	ENSMUSG00000029231	8	1	VLMC
Pdyn	ENSMUSG00000027400	7	1	Sst interneurons
Pdzd2	ENSMUSG00000022197	7	1	Cajal-Retzius cells
Pdzrn3	ENSMUSG00000035357	8	1	L4 RSP-ACA
Pecam1	ENSMUSG00000020717	8	1	Endothelial cells
Penk	ENSMUSG00000045573	8	1	Vip interneurons
Pglyrp1	ENSMUSG00000030413	5	1	Endothelial cells
Pip5k1b	ENSMUSG00000024867	8	1	Pericytes / smooth muscle cells
Pkib	ENSMUSG00000019876	8	1	L2 IT ENTl
Plch1	ENSMUSG00000036834	8	1	L3 IT ENT
Plcxd2	ENSMUSG00000087141	8	1	L5 NP CTX
Plcxd3	ENSMUSG00000049148	8	1	L2 IT ENTl
Plekha2	ENSMUSG00000031557	8	1	Pericytes / smooth muscle cells
Pln	ENSMUSG00000038583	8	1	Pericytes / smooth muscle cells
Pou3f1	ENSMUSG00000090125	4	1	L5 PPP
Ppp1r1b	ENSMUSG00000061718	8	1	L6 CT CTX
Prdm8	ENSMUSG00000035456	8	1	CA2
Prox1	ENSMUSG00000010175	8	1	Dentate gyrus granule cells
Prph	ENSMUSG00000023484	6	1	L4 RSP-ACA
Prr16	ENSMUSG00000073565	8	1	L5 NP CTX
Prss35	ENSMUSG00000033491	8	1	CT SUB
Pthlh	ENSMUSG00000048776	8	1	Vip interneurons
Pvalb	ENSMUSG00000005716	6	1	Pvalb interneurons
Rab3b	ENSMUSG00000003411	8	1	Sst interneurons
Rasgrf2	ENSMUSG00000021708	8	1	Lamp5 interneurons
Rasl10a	ENSMUSG00000034209	4	1	Dentate gyrus granule cells
Rbp4	ENSMUSG00000024990	8	1	Sst interneurons
Rfx4	ENSMUSG00000020037	8	1	Astrocytes
Rims3	ENSMUSG00000032890	8	1	L4/5 IT CTX
Rmst	ENSMUSG00000112117	8	1	CT SUB
Rnf152	ENSMUSG00000047496	8	1	L5 NP CTX
Ror1	ENSMUSG00000035305	8	1	VLMC
Rorb	ENSMUSG00000036192	8	1	Astrocytes
Rprm	ENSMUSG00000075334	8	1	L6 CT CTX
Rspo1	ENSMUSG00000028871	7	1	L4 RSP-ACA
Rspo2	ENSMUSG00000051920	8	1	L2 IT ENTm
Rxfp1	ENSMUSG00000034009	7	1	L5 PPP
Satb2	ENSMUSG00000038331	8	1	NP PPP
Sdk2	ENSMUSG00000041592	8	1	L6b CTX
Sema3a	ENSMUSG00000028883	8	1	L2 IT ENTl
Sema3d	ENSMUSG00000040254	8	1	Oligodendrocytes
Sema3e	ENSMUSG00000063531	8	1	Meis2
Sema5b	ENSMUSG00000052133	7	1	NP SUB
Sema6a	ENSMUSG00000019647	8	1	Oligodendrocytes
Shisa6	ENSMUSG00000053930	8	1	CA3
Siglech	ENSMUSG00000051504	8	1	Microglia / perivascular macrophages
Sipa1l3	ENSMUSG00000030583	8	1	CA1-ProS
Sla	ENSMUSG00000022372	8	1	Microglia / perivascular macrophages
Slc13a4	ENSMUSG00000029843	7	1	VLMC
Slc17a6	ENSMUSG00000030500	8	1	Cajal-Retzius cells
Slc17a7	ENSMUSG00000070570	2	1	L2 IT ENTl
Slc39a12	ENSMUSG00000036949	8	1	Astrocytes
Slc44a5	ENSMUSG00000028360	8	1	Sncg interneurons
Slc6a3	ENSMUSG00000021609	8	1	Meis2
Slfn5	ENSMUSG00000054404	8	1	Endothelial cells
Slit2	ENSMUSG00000031558	8	1	Pvalb interneurons
Sncg	ENSMUSG00000023064	6	1	Pericytes / smooth muscle cells
Sntb1	ENSMUSG00000060429	8	1	Pericytes / smooth muscle cells
Sorcs3	ENSMUSG00000063434	8	1	Vip interneurons
Sox10	ENSMUSG00000033006	8	1	Oligodendrocytes
Sox11	ENSMUSG00000063632	8	1	L6b/CT ENT
Sox17	ENSMUSG00000025902	8	1	Endothelial cells
Spag16	ENSMUSG00000053153	8	1	L6 IT ENTl
Spi1	ENSMUSG00000002111	8	1	Microglia / perivascular macrophages
Spp1	ENSMUSG00000029304	8	1	VLMC
Sst	ENSMUSG00000004366	2	1	Sst Chodl inteneurons
Stard5	ENSMUSG00000046027	7	1	NP SUB
Strip2	ENSMUSG00000039629	8	1	CA2
Syndig1	ENSMUSG00000074736	6	1	CA2
Syt17	ENSMUSG00000058420	8	1	L6 IT ENTl
Syt2	ENSMUSG00000026452	8	1	L5 PPP
Syt6	ENSMUSG00000027849	8	1	Meis2
Tacr1	ENSMUSG00000030043	8	1	Sst Chodl inteneurons
Tanc1	ENSMUSG00000035168	8	1	Dentate gyrus granule cells
Th	ENSMUSG00000000214	8	1	Meis2
Thsd7a	ENSMUSG00000032625	8	1	Vip interneurons
Tle4	ENSMUSG00000024642	8	1	NP PPP
Tmem132d	ENSMUSG00000034310	8	1	Car3
Tmem163	ENSMUSG00000026347	8	1	Cajal-Retzius cells
Tmem255a	ENSMUSG00000036502	8	1	L2/3 IT RHP
Tox	ENSMUSG00000041272	8	1	NP PPP
Trbc2	ENSMUSG00000076498	4	1	L6 CT CTX
Trem2	ENSMUSG00000023992	4	1	Microglia / perivascular macrophages
Trp73	ENSMUSG00000029026	8	1	Cajal-Retzius cells
Trpc4	ENSMUSG00000027748	7	1	SUB-ProS
Unc13c	ENSMUSG00000062151	8	1	L2 IT ENTm
Vat1l	ENSMUSG00000046844	8	1	L5 PPP
Vip	ENSMUSG00000019772	8	1	Vip interneurons
Vwc2l	ENSMUSG00000045648	8	1	NP SUB
Wfs1	ENSMUSG00000039474	8	1	CA1-ProS
Zfp366	ENSMUSG00000050919	8	1	Endothelial cells
Zfp536	ENSMUSG00000043456	8	1	Oligodendrocytes
Zfpm2	ENSMUSG00000022306	8	1	CT SUB

## Sheet: Selected genes
Genes	Ensembl_ID
Otud7b	ENSMUSG00000038495		Deubiquitinating enzymes
Otulin	ENSMUSG00000046034
Sox2	ENSMUSG00000074637
Sox9	ENSMUSG00000000567		Astrocyte Markers
S100b	ENSMUSG00000033208
Il1b	ENSMUSG00000027398
Il6	ENSMUSG00000025746
Il6ra	ENSMUSG00000027947
Il10	ENSMUSG00000016529
Il16	ENSMUSG00000001741
Il17b	ENSMUSG00000024578		Cytokines
Ifng	ENSMUSG00000055170
Nos2	ENSMUSG00000020826
Csf2	ENSMUSG00000018916
Tnf	ENSMUSG00000024401
Cxcl2	ENSMUSG00000058427
Cxcl9	ENSMUSG00000029417
Cxcl10	ENSMUSG00000034855
CXCL11	ENSMUSG00000060183
Cxcl12	ENSMUSG00000061353
Cxcl13	ENSMUSG00000023078
Ccl2	ENSMUSG00000035385
Ccl3	ENSMUSG00000000982
Ccl6	ENSMUSG00000018927
Ccl7	ENSMUSG00000035373
Ccl8	ENSMUSG00000009185		Chemokines/ligands
Ccl17	ENSMUSG00000031780
Ripk1	ENSMUSG00000021408
Bcl2	ENSMUSG00000057329
Bcl2l1	ENSMUSG00000007659
Birc2	ENSMUSG00000057367
Traf2	ENSMUSG00000026942		Cell death
Cflar	ENSMUSG00000026031
Casp1	ENSMUSG00000025888
Casp3	ENSMUSG00000031628
Casp8	ENSMUSG00000026029
Fas	ENSMUSG00000024778
Tnfaip3	ENSMUSG00000019850
Gata4	ENSMUSG00000021944
Nfkb1	ENSMUSG00000028163
Jun	ENSMUSG00000052684
Fos	ENSMUSG00000021250
Nfix	ENSMUSG00000001911		Transcription Factors regulating GFAP
Mapk11	ENSMUSG00000053137
Mapk13	ENSMUSG00000004864
Tgfb1	ENSMUSG00000002603
Stat3	ENSMUSG00000004040
Cd8a	ENSMUSG00000053977
Cd4	ENSMUSG00000023274		B/T cells
Cd3e	ENSMUSG00000032093
Cd19	ENSMUSG00000030724

## Sheet: Sheet1
Genes	Ensembl_ID
